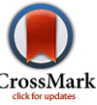

## Correction

# Correction: Inverse Associations between Obesity Indicators and Thymic T-Cell Production Levels in Aging Atomic-Bomb Survivors

## The PLOS ONE Staff

In the Materials and Methods section under “Measurement of TREC Numbers,” the formula for calculating the number of TRECs per sample is incorrect. The correct formula is:  
Number of TREC copies per 10,000 cells =  $10,000/2^x$

## Reference

1. Yoshida K, Nakashima E, Kubo Y, Yamaoka M, Kajimura J, et al. (2014) Inverse Associations between Obesity Indicators and Thymic T-Cell Production Levels in Aging Atomic-Bomb Survivors. PLoS ONE 9(3): e91985. doi:10.1371/journal.pone.0091985.

---

**Citation:** The PLOS ONE Staff (2014) Correction: Inverse Associations between Obesity Indicators and Thymic T-Cell Production Levels in Aging Atomic-Bomb Survivors. PLOS ONE 9(6): e101097. doi:10.1371/journal.pone.0101097

**Published:** June 19, 2014

**Copyright:** © 2014 The PLOS ONE Staff. This is an open-access article distributed under the terms of the Creative Commons Attribution License, which permits unrestricted use, distribution, and reproduction in any medium, provided the original author and source are credited.
